# Supplementary material
Source: PubMed Central journal article supplement (PMC5314185)
Supplement: 10.1074_M116.769893_jbc.M116.769893-1.pdf [file 10.1074_M116.769893_jbc.M116.769893-1.pdf]

| miRNA                  | Putative Target | miRNA                   | Putative Target | miRNA               | Putative Target | miRNA              | Putative Target | miRNA          | Pubmed ID | Compartment                                  | miRNA           | Pubmed ID | Compartment                                |
|------------------------|-----------------|-------------------------|-----------------|---------------------|-----------------|--------------------|-----------------|----------------|-----------|----------------------------------------------|-----------------|-----------|--------------------------------------------|
| Th1/Th17               |                 |                         |                 | Regulatory          |                 |                    |                 | Th1/Th17       |           |                                              | Regulatory      |           |                                            |
| miR-155-5p             | ARCA1           | miR-155-5p              | MRP27           | miR-155-5p          | AGOR8           | miR-21-5p          | HCHTN           | hsa-miR-155-5p | 1920059   | pulmonary arterial endothelial cells (HPACC) | miR-miR-146a-5p | 20120513  | peritoneal ligament (PCL) cells            |
| miR-155-5p             | AGT81           | miR-155-3p              | MSMD1           | miR-150             | AGA             | miR-21-5p          | NFIB            |                | 2165468   | neuroblastoma                                |                 | 19944095  | microvascular endothelial cells            |
| miR-155-5p             | APAF1           | miR-155-5p              | MYBL1           | miR-21-5p           | APAF1           | miR-146a           | NFIB            |                | 20940405  | tumor cell lines                             |                 | 18605046  | breast and/or ovarian cancer               |
| miR-106a-5p            | APP             | miR-15a-3p              | MYCN            | miR-21-5p           | APPL1           | miR-146a           | NFIB1           |                | 20295512  | endothelial cells                            |                 | 18057241  | EBV latency type III and type I cell lines |
| miR-155-5p             | ARFP1           | miR-106a-5p             | MYUP            | miR-146a            | ASMG1           | miR-146a           | NMR             |                | 20305691  | glioblastoma spheroid                        |                 | 20581935  | microglial cells                           |
| miR-15a-3p             | ARHGAP1         | miR-155-5p              | MYO1D           | miR-21-5p           | ATMNA           | miR-21-5p          | RUP2            |                | 21751348  | lung cancer                                  |                 | 21236257  | dendritic cells                            |
| miR-155-5p             | ARID2           | miR-155-5p              | MARS            | miR-146a            | ATDMA           | miR-146a           | DAB1            |                | 18758459  | Cerebellar Purkinje cells                    |                 | 20375304  | pituitary and interstitial dendritic cells |
| miR-106a-5p            | ARID4B          | miR-155-5p              | NOX2-1          | miR-146a            | ATNN1           | miR-146a           | OLFM2A          |                | 14697198  | HeLa cell                                    |                 | 1858019   | megakaryocytes                             |
| miR-15a-3p             | ARH2            | miR-155-5p              | NOVA1           | miR-21-5p           | BASP1           | miR-150            | P2RX7           |                | 20080637  | neuroblastoma                                |                 | 20124483  | pancreatic cancer cells                    |
| miR-155-5p             | ARL15           | miR-15a-3p              | NPEPL1          | miR-21-5p           | BCL2            | miR-146a           | PA2G4           |                | 19296933  | blastocyst                                   |                 | 19965651  | T lymphocytes                              |
| miR-155-5p             | ARHGAP5         | miR-106a                | NRGA2           | miR-146a            | BLAH            | miR-146a           | PBLD            |                | 23451058  | prostate cancer                              |                 | 20459811  | CD4+ T cells                               |
| miR-155-5p             | ARMC2           | miR-155-5p              | PAR2            | miR-21-5p           | SHPR2           | miR-21-5p          | PCD4            |                | 22552685  | breast cancer cells                          |                 | 18304433  | breast cancer cells                        |
| miR-155-5p             | ARPC3           | miR-106a-5p             | PAK7            | miR-146a            | BRCA1           | miR-21-5p          | PDHA2           |                | 18728182  | multiple myeloma                             |                 | 19313302  | peripheral blood leukocytes                |
| miR-15a-3p             | ATXN1           | miR-155-5p              | PALD1           | miR-146a            | BRCA2           | miR-146a           | PDH11           |                | 20133739  | endothelial cells                            |                 | 18174313  | prostate cancer                            |
| miR-155-5p             | BACH1           | miR-155-5p              | PBRM1           | miR-21-5p           | BTG2            | miR-146a           | PDJMB3          |                | 19885849  | embryonic stem cells                         |                 | 18381801  | neurons                                    |
| miR-15a-3p             | BCL2L11         | miR-155-5p              | PCODA           | miR-146a            | CLOR21          | miR-21-5p          | PELI1           |                | 18694959  | B lymphocytes                                |                 | 20451487  | 57HdhQ1111/HdhQ1111 cells                  |
| miR-15a-3p             | BAP2            | miR-155-5p              | PCP2            | miR-146a            | CCP2            | miR-146a           | PXN10           |                | 18110054  | neuronal cell lines                          |                 | 18759864  | periphera blood mononuclear cells          |
| miR-155-5p             | BRIP1           | miR-155-5p              | PHF14           | miR-146a            | CC127           | miR-146a           | PLEKHA4         |                | 12755136  | T cells                                      |                 | 23435376  | gastric cancer cells                       |
| miR-155-5p             | CTGAP2          | miR-155-5p              | PICALM          | miR-146a            | COL8            | miR-21-5p          | PLD3            |                | 18212054  | solid tumors                                 |                 | 19190326  | breast cancer cells                        |
| miR-155-5p             | C16orf62        | miR-155-5p              | PKN2            | miR-146a            | CCNA2           | miR-146a           | PDZL2           |                | 23438603  | trophoblasts                                 |                 | 19596990  | macrophages                                |
| miR-155-5p             | C1orf18         | miR-155-5p              | POLE3           | miR-146a            | CCN9            | miR-21-5p          | PPM1L           |                | 20643754  | 3-D tissue culture system                    |                 | 19885212  | monocyte                                   |
| miR-155-5p             | CBR4            | miR-155-5p              | PRAR5           | miR-146a            | CCNA16          | miR-21-5p          | PPV19           |                | 19300576  | lung cancer                                  |                 | 20210812  | lymphoblasts                               |
| miR-155-5p, miR-15a-3p | CENOD           | miR-106a-5p, miR-15a-3p | PTEN            | miR-146a            | CCNB            | miR-146a           | PRF15           |                | 19762699  | trabecular meshwork (HTM) cells              | hsa-miR-150-5p  | 20567763  | gastric cancer cells                       |
| miR-155-5p             | CDC40           | miR-155-5p              | RAB11FIP2       | miR-146a            | CD81            | miR-21-5p          | PRK1            |                | 19175831  | gastric tissues                              |                 | 18667440  | hematopoietic cells                        |
| miR-106a-5p            | CDKN1A          | miR-15a-3p              | RAB13           | miR-146a            | CD86            | miR-21-5p          | PTEN            |                | 16461460  | solid tumors                                 |                 | 23166298  | macrophages                                |
| miR-155-5p             | CDAPN1          | miR-15a-3p              | RAB14           | miR-21-5p           | CD2PSA          | miR-21-5p          | PTFRC1          |                | 17584948  | monocytes                                    |                 | 18642383  | cancer epithelial cells                    |
| miR-155-5p             | CENK1A1         | miR-155-5p              | RAP8F2          | miR-21-5p           | CDK2AP1         | miR-150            | PTPRH           |                | 22912877  | colorectal cancer                            |                 | 18120040  | COS-7 fibroblast like cells                |
| miR-15a-3p             | CEP1            | miR-155-5p              | RBI             | miR-146a            | CDN3            | miR-146a           | RAG3A           |                | 18320040  | COS-7 fibroblast-like cells                  |                 | 20113125  | esophageal squamous cell carcinoma         |
| miR-106a-5p            | CYP19A1         | miR-155-5p              | RAR             | miR-146a            | CDN3            | miR-146a           | RAG1            |                | 16521848  | colon cancer cells                           | hsa-miR-21-5p   | 20571350  | embryonic kidney (HEK) 293 cells           |
| miR-155-5p             | DCUN1D2         | miR-155-5p              | RHEB            | miR-146a            | CFH             | miR-21-5p          | RASGRP1         |                | 17588945  | B cells                                      |                 | 18919254  | breast cancer cells                        |
| miR-155-5p             | DET1            | miR-106a-5p             | RUNX1           | miR-146a            | COL13A1         | miR-21-5p          | ROR11           |                | 20584899  | Mutu 1 cell line                             |                 | 19342589  | epidermal stem cells                       |
| miR-155-5p             | DHX40           | miR-155-5p              | SCDBP           | miR-146a            | CKOR4           | miR-21-5p          | ROR1            |                | 22858023  | extravillous trophoblast HTR-8/Svneo cells   |                 | 21826087  | prostate cancer                            |
| miR-15a-3p             | DYRK1           | miR-155-5p              | SECISBP2        | miR-21-5p           | ENR1            | miR-146a           | ROR2            |                | 23166460  | cell lines                                   |                 | 19578724  | prostate cancer                            |
| miR-106a-5p            | EF2             | miR-155-5p              | SLC33A1         | miR-21-5p           | EC2             | miR-146a           | RG31            |                | 22785227  | T cells                                      |                 | 19826040  | colon cancer cells                         |
| miR-155-5p             | EF2             | miR-155-5p              | SMAD2           | miR-146a, miR-21-5p | EGFR            | miR-146a           | RG318           |                | 21036908  | Macrophages                                  |                 | 23128460  | HaCaT cells                                |
| miR-155-5p             | EIF2C4          | miR-15a-3p              | SMAD4           | miR-150             | EGR2            | miR-21-5p          | RHOB            |                | 20680360  | T cells                                      |                 | 20048743  | glioblastoma (GBM) cell lines              |
| miR-15a-3p             | ERBB4           | miR-155-5p              | SMARCA4         | miR-21-5p           | EP3C2           | miR-21-5p          | RNF11           |                | 17881434  | primary effusion lymphoma                    |                 | 202731612 | A549 lung cancer cells                     |
| miR-15a-3p             | ESR1            | miR-15a-3p              | SOC1            | miR-146a            | EP3C2           | miR-146a           | ROR2            |                | 23209550  | gastric mucosa-associated lymphoid tissue    |                 | 18629576  | glioblastoma cells                         |
| miR-155-5p             | ETS1            | miR-15a-3p              | SUZ12           | miR-146a            | EP301           | miR-21-5p          | RPS7            |                | 23353010  | breast cancer cells                          |                 | 19358872  | dendritic cells                            |
| miR-155-5p             | FAM135A         | miR-155-5p              | TAB2            | miR-146a            | FADD            | miR-21-5p          | RTN4            |                | 18367533  | Epsilon-Barr virus (EBV)-infected cells      |                 | 19559015  | glioblastoma                               |
| miR-155-5p             | FAM177A1        | miR-155-5p              | TBC1D8B         | miR-146a            | FAP1            | miR-21-5p          | RUP3            |                | 18668040  | B cells                                      |                 | 19302977  | prostate cancer cells                      |
| miR-155-5p             | FAM81A          | miR-155-5p              | TBCA            | miR-21-5p           | FAM130B         | miR-146a           | SOCBP2          |                | 17911264  | pancreatic cancer cells                      |                 | 19435867  | pancreatic cancer cells                    |
| miR-155-5p             | GABARAPL1       | miR-155-5p              | TCF12           | miR-21-5p           | FASLG           | miR-21-5p          | SEPPIN5         |                | 19193653  | monocyte-derived dendritic cells             |                 | 21078976  | colorectal cancer                          |
| miR-155-5p             | GATM            | miR-106a-5p, miR-15a-3p | TGFB2           | miR-21-5p           | FOSB            | miR-21-5p          | SGR1            |                | 18262046  | primary vascular smooth muscle cell          |                 | 18384814  | promyelocytic cell line                    |
| miR-155-5p             | GOLT1B          | miR-15a-3p              | THBS1           | miR-21-5p           | FTN             | miR-21-5p          | SLK             |                | 17666390  | fibroblasts                                  |                 | 23469214  | HELF cells                                 |
| miR-155-5p             | HAL             | miR-155-5p              | TLE4            | miR-146a            | GIMAP4          | miR-146a           | SLP             |                | 16675453  | fibroblasts                                  |                 | 19060824  | leiomyoma                                  |
| miR-155-5p             | HBP1            | miR-155-5p              | TMGSF1          | miR-21-5p           | GLCC1           | miR-21-5p          | SMAD7           |                | 19759154  | fibroblasts                                  |                 | 20483747  | CD4+ T cells                               |
| miR-155-5p             | HDRAC4          | miR-155-5p              | TOMM20          | miR-21-5p           | GNAH            | miR-21-5p          | SMAD3           |                | 19242418  | embryonic stem cells                         |                 | 19242418  | embryonic stem cells                       |
| miR-106a-5p            | HNR1            | miR-155-5p              | TSP1AP1         | miR-21-5p           | GPR12           | miR-146a           | SMAD2           |                | 20131153  | endothelial cells                            |                 | 23112353  | endothelial cells                          |
| miR-155-5p             | HIVEP2          | miR-155-5p              | TRAK1           | miR-21-5p           | GXYL2           | miR-146a           | SPAT5L          |                | 18270520  | old tumors                                   |                 | 18270520  | old tumors                                 |
| miR-15a-3p             | HMOX5           | miR-155-5p              | TRIP13          | miR-21-5p           | HNRNP11         | miR-146a           | SPR1            |                | 23292313  | diabetic kidneys                             |                 | 23292313  | diabetic kidneys                           |
| miR-106a-5p            | IL10            | miR-155-5p              | TTY1            | miR-21-5p           | HNRNPK          | miR-21-5p          | SPR1            |                | 18508928  | cardiocytes                                  |                 | 23209776  | renal cancer                               |
| miR-15a-3p             | IMPDH1          | miR-155-5p              | UBQLN1          | miR-21-5p           | HS1ST181        | miR-21-5p          | SPR2            |                | 23209776  | renal cancer                                 |                 | 23209776  | renal cancer                               |
| miR-155-5p             | IRX1P2          | miR-155-5p              | UBI3            | miR-146a            | HS1ST181        | miR-21-5p          | SPR2            |                | 23209776  | renal cancer                                 |                 | 23209776  | renal cancer                               |
| miR-155-5p             | ITK             | miR-155-5p              | UPF2            | miR-146a            | HS1ST181        | miR-21-5p          | SPR2            |                | 23209776  | renal cancer                                 |                 | 23209776  | renal cancer                               |
| miR-155-5p             | JARID2          | miR-106a-5p             | VEGFA           | miR-146a            | IFM4L           | miR-21-5p          | STAT3           |                | 21542422  | prostate cancer cell                         |                 | 21542422  | prostate cancer cell                       |
| miR-15a-3p             | KAT2B           | miR-155-5p              | VHL             | miR-146a            | IFIT1           | miR-146a           | TBP             |                | 19253296  | breast cancer cells                          |                 | 19253296  | breast cancer cells                        |
| miR-155-5p             | KOT802          | miR-155-5p              | VPS18           | miR-146a            | IFIT3           | miR-21-5p          | TCF21           |                | 17963372  | MCF-7 cells                                  |                 | 17963372  | MCF-7 cells                                |
| miR-155-5p             | KIAA0480        | miR-155-5p              | VPS4B           | miR-146a            | IFITM4          | miR-21-5p          | TGFBP2          |                | 17478730  | vascular wall                                |                 | 17478730  | vascular wall                              |
| miR-155-5p             | KLHL5           | miR-155-5p              | WBP11           | miR-146a            | IFITM3          | miR-21-5p          | TGAM1           |                | 17173344  | MCF-7 cells                                  |                 | 17173344  | MCF-7 cells                                |
| miR-155-5p             | KRAS            | miR-155-5p              | WEE1            | miR-146a            | IL8             | miR-146a           | TNME155         |                | 19816956  | mesenchymal stem cells                       |                 | 19816956  | mesenchymal stem cells                     |
| miR-155-5p             | KRC1            | miR-155-5p              | WHSC1L1         | miR-146a            | IRAK1           | miR-21-5p          | TNIP1           |                | 18794840  | gastric cancer                               |                 | 18794840  | gastric cancer                             |
| miR-155-5p             | LCORL           | miR-155-5p              | WVC1            | miR-146a            | IRAK2           | miR-146a           | TLR2            |                | 21069438  | colorectal cancer                            |                 | 21069438  | colorectal cancer                          |
| miR-155-5p             | UNX1            | miR-155-5p              | ZKSCAN5         | miR-146a            | IRF5            | miR-21-5p          | TNIP3           |                | 19849969  | colon cancer cells                           |                 | 19849969  | colon cancer cells                         |
| miR-155-5p             | LRRC5           | miR-155-5p              | ZNF254          | miR-146a            | ISG15           | miR-21-5p          | TNFA25A         |                | 19872302  | postauricular skin                           |                 | 19872302  | postauricular skin                         |
| miR-155-5p             | MAS1L           | miR-155-5p              | ZNF273          | miR-146a            | ITGBL1          | miR-146a           | TNFA15A         |                | 19276261  | esophageal squamous cell carcinoma           |                 | 19276261  | esophageal squamous cell carcinoma         |
| miR-155-5p             | MCM8            | miR-155-5p              | ZNF28           | miR-21-5p           | JAG1            | miR-146a           | TNMC2           |                | 19419954  | glioma cells                                 |                 | 19419954  | glioma cells                               |
| miR-15a-3p             | MCP2            | miR-155-5p              | ZNF561          | miR-146a            | KIF22           | miR-21-5p          | TNFRSF11B       |                | 19133651  | hepatocellular carcinoma                     |                 | 19133651  | hepatocellular carcinoma                   |
| miR-155-5p             | MED13L          | miR-155-5p              | ZNF611          | miR-21-5p           | KIF9            | miR-21-5p          | TFS3            |                | 18850008  | solid tumors                                 |                 | 18850008  | solid tumors                               |
| miR-155-5p             | MIPPS           | miR-155-5p              | ZNF652          | miR-146a            | LMO2            | miR-21-5p          | TNFI            |                | 18682630  | HeLa cervical carcinoma cells                |                 | 18682630  | HeLa cervical carcinoma cells              |
| miR-155-5p             | MIPPL1B         | miR-155-5p              | ZNF63           | miR-21-5p           | LRRFP1          | miR-146a           | TNFA6           |                | 17968323  | colorectal cancer                            |                 | 17968323  | colorectal cancer                          |
|                        |                 |                         |                 | miR-146a            | LTB             | miR-146a           | TNMT14          |                | 17991735  | breast cancer cells                          |                 | 17991735  | breast cancer cells                        |
|                        |                 |                         |                 | miR-21-5p           | MARCKS          | miR-146a           | TNMT22          |                | 18372920  | breast cancer cells                          |                 | 18372920  | breast cancer cells                        |
|                        |                 |                         |                 | miR-21-5p           | MIRN1           | miR-150, miR-21-5p | VEGFA           |                | 16966691  | 4 pancreatic primary tumors                  |                 | 16966691  | 4 pancreatic primary tumors                |
|                        |                 |                         |                 | miR-146a            | MCM10           | miR-146a           | VWCE            |                | 11829576  | glioblastoma cells                           |                 | 11829576  | glioblastoma cells                         |
|                        |                 |                         |                 | miR-146a            | MCPH1           | miR-146a           | WAF2            |                | 19546066  | hepatal carcinoma tissue                     |                 | 19546066  | hepatal carcinoma tissue                   |
|                        |                 |                         |                 | miR-146a            | METTL7A         | miR-21-5p          | WFS1            |                |           |                                              |                 |           |                                            |
|                        |                 |                         |                 | miR-21-5p           | MMP9            | miR-21-5p          | WDR6            |                |           |                                              |                 |           |                                            |
|                        |                 |                         |                 | miR-21-5p           | MORC3           | miR-21-5p          | WNT1            |                |           |                                              |                 |           |                                            |
|                        |                 |                         |                 | miR-146a            | MRI             | miR-21-5p          | WDR2            |                |           |                                              |                 |           |                                            |
|                        |                 |                         |                 | miR-150             | MSEA3           | miR-21-5p          | WDR3            |                |           |                                              |                 |           |                                            |
|                        |                 |                         |                 | miR-21-5p           | MIR2            | miR-21-5p          | YOD1            |                |           |                                              |                 |           |                                            |
|                        |                 |                         |                 | miR-146a            | MTUS2           | miR-21-5p          | YHDC2           |                |           |                                              |                 |           |                                            |
|                        |                 |                         |                 | miR-150             | MYR             | miR-146a           | ZBTB32          |                |           |                                              |                 |           |                                            |
|                        |                 |                         |                 | miR-150             | MYO8B           | miR-150            | ZEB1            |                |           |                                              |                 |           |                                            |
|                        |                 |                         |                 | miR-21-5p           | NCAM2           | miR-21-5p          | ZNF35           |                |           |                                              |                 |           |                                            |

Supplementary Table I. EV-associated miRNA gene targets

**Left.** List of the 142 mRNAs that are validated targets of Th1/Th17-derived EV miRNAs and the 172 mRNAs that are validated targets of Treg-derived EV miRNAs (miRSearch v3.0 web tool, Exiqon). **Right.** List of PUBMED references and the biological models used for the experimental evidence supporting the interaction between miRNA and listed validated mRNA targets.
